# Supplementary material
Source: publisher site journal article supplement (https://www.dovepress.com/article/supplementary_file/586858/586858%20Supplementary%20Tables.docx)
Supplement: Supplementary file 1 [file 586858%20Supplementary%20Tables.docx]

**Supplementary Table S1. Detailed characteristics of genetic instruments used for the MR analysis of Common Analgesics on Chronic Obstructive Pulmonary Disease**

| **Outcome Phenotype** | **SNP** | **Chr** | **Pos** | **Effect Allele** | **Other Allele** | **EAF (Exposure)** | **Beta (Exposure)** | **SE (Exposure)** | **P-value (Exposure)** | **R² (%)** | **F-statistic** | **Beta (Outcome: COPD)** | **SE (Outcome: COPD)** | **P-value (Outcome: COPD)** |
| --- | --- | --- | --- | --- | --- | --- | --- | --- | --- | --- | --- | --- | --- | --- |
| Paracetamol | rs11153082 | 6 | 97059666 | G | A | 0.3218 | 0.006577 | 0.000921 | 9.00E-13 | 0.001888 | 8.64 | -0.007769 | 0.010650 | 0.465708 |
| Paracetamol | rs11172113 | 12 | 57527283 | C | T | 0.4119 | -0.009604 | 0.000873 | 4.00E-28 | 0.004469 | 20.45 | -0.016114 | 0.009956 | 0.105540 |
| Paracetamol | rs12134493 | 1 | 115677946 | A | C | 0.1186 | 0.008103 | 0.001338 | 1.40E-09 | 0.001372 | 6.28 | 0.006874 | 0.014243 | 0.629366 |
| Paracetamol | rs12199994 | 6 | 30723914 | G | A | 0.1699 | 0.006497 | 0.001146 | 1.50E-08 | 0.001191 | 5.45 | -0.004732 | 0.011552 | 0.682070 |
| Paracetamol | rs12510409 | 4 | 67784392 | A | C | 0.5726 | -0.004920 | 0.000873 | 1.70E-08 | 0.001185 | 5.42 | -0.021132 | 0.009903 | 0.032845 |
| Paracetamol | rs17652520 | 17 | 44098967 | A | G | 0.2299 | 0.009441 | 0.001024 | 3.00E-20 | 0.003156 | 14.44 | -0.004918 | 0.017199 | 0.774924 |
| Paracetamol | rs1793319 | 1 | 174764608 | G | A | 0.6069 | 0.005071 | 0.000880 | 8.30E-09 | 0.001227 | 5.62 | 0.028304 | 0.010010 | 0.004689 |
| Paracetamol | rs2134063 | 9 | 109695139 | G | A | 0.1584 | 0.007066 | 0.001183 | 2.40E-09 | 0.001331 | 6.09 | 0.009303 | 0.012165 | 0.444413 |
| Paracetamol | rs247975 | 3 | 173107443 | C | T | 0.5320 | 0.004946 | 0.000864 | 1.00E-08 | 0.001218 | 5.57 | 0.025696 | 0.009845 | 0.009055 |
| Paracetamol | rs3130486 | 6 | 31722780 | T | C | 0.2663 | -0.008979 | 0.000973 | 2.80E-20 | 0.003151 | 14.42 | -0.020663 | 0.010000 | 0.038790 |
| Paracetamol | rs3863852 | 2 | 211250602 | A | G | 0.5882 | 0.004999 | 0.000881 | 1.40E-08 | 0.001211 | 5.54 | 0.003826 | 0.009868 | 0.698245 |
| Paracetamol | rs4663983 | 2 | 234815005 | G | A | 0.1938 | -0.008818 | 0.001087 | 5.00E-16 | 0.002430 | 11.12 | -0.022598 | 0.013420 | 0.092198 |
| Paracetamol | rs55980976 | 17 | 10540095 | G | T | 0.7533 | -0.005499 | 0.000998 | 3.50E-08 | 0.001124 | 5.14 | 0.001000 | 0.011138 | 0.928430 |
| Paracetamol | rs6429422 | 1 | 243472801 | G | T | 0.3190 | 0.006315 | 0.000923 | 7.80E-12 | 0.001733 | 7.93 | 0.018902 | 0.010446 | 0.070374 |
| Paracetamol | rs7759877 | 6 | 20898140 | T | C | 0.6599 | -0.005347 | 0.000914 | 4.90E-09 | 0.001283 | 5.87 | -0.019702 | 0.010136 | 0.051936 |
| Paracetamol | rs9913787 | 17 | 43146432 | A | G | 0.2951 | 0.005162 | 0.000943 | 4.40E-08 | 0.001108 | 5.07 | 0.003700 | 0.011424 | 0.746033 |
| Aspirin | rs117733303 | 6 | 160922870 | G | A | 0.0184 | 0.019490 | 0.002681 | 3.60E-13 | 0.001373 | 6.28 | -0.090592 | 0.047622 | 0.057132 |
| Aspirin | rs1831733 | 9 | 22076071 | C | T | 0.4783 | 0.007072 | 0.000725 | 1.70E-22 | 0.002496 | 11.42 | -0.015854 | 0.010038 | 0.114245 |
| Aspirin | rs35687905 | 8 | 74826565 | C | T | 0.1132 | 0.006515 | 0.001144 | 1.20E-08 | 0.000853 | 3.90 | 0.019730 | 0.016296 | 0.226013 |
| Aspirin | rs3918226 | 7 | 150690176 | T | C | 0.0810 | 0.007824 | 0.001342 | 5.50E-09 | 0.000912 | 4.17 | -0.005173 | 0.019241 | 0.788056 |
| Aspirin | rs583104 | 1 | 109821307 | T | G | 0.7732 | 0.006605 | 0.000861 | 1.70E-14 | 0.001530 | 7.00 | -0.011721 | 0.011762 | 0.318991 |
| Aspirin | rs6857462 | 4 | 52695704 | G | T | 0.2940 | 0.004951 | 0.000801 | 6.30E-10 | 0.001018 | 4.66 | 0.002504 | 0.010761 | 0.815989 |
| Aspirin | rs7214826 | 17 | 46888574 | T | G | 0.2602 | -0.004801 | 0.000822 | 5.30E-09 | 0.000888 | 4.06 | 0.004409 | 0.011512 | 0.701698 |
| Aspirin | rs73015016 | 19 | 11191300 | A | G | 0.1193 | -0.007755 | 0.001113 | 3.30E-12 | 0.001263 | 5.78 | 0.017988 | 0.016273 | 0.268994 |
| Aspirin | rs7412 | 19 | 45412079 | T | C | 0.0801 | -0.009951 | 0.001330 | 7.20E-14 | 0.001459 | 6.68 | 0.042281 | 0.021311 | 0.047255 |
| Ibuprofen | rs1544861 | 11 | 10679441 | C | T | 0.6657 | 0.004498 | 0.000788 | 1.20E-08 | 0.000901 | 4.12 | -0.029518 | 0.010094 | 0.003452 |
| Ibuprofen | rs2273621 | 6 | 97058553 | G | A | 0.3228 | 0.005047 | 0.000794 | 2.10E-10 | 0.001113 | 5.09 | -0.007577 | 0.010628 | 0.475861 |
| Ibuprofen | rs3737240 | 1 | 150483355 | T | C | 0.3960 | -0.004360 | 0.000758 | 8.70E-09 | 0.000909 | 4.16 | 0.001350 | 0.009917 | 0.891716 |
| Ibuprofen | rs4759276 | 12 | 57526646 | A | G | 0.3898 | -0.007115 | 0.000763 | 1.10E-20 | 0.002408 | 11.02 | -0.012990 | 0.010136 | 0.199983 |
| Ibuprofen | rs62064641 | 17 | 43488792 | C | T | 0.1865 | 0.005686 | 0.000955 | 2.60E-09 | 0.000981 | 4.49 | 0.001885 | 0.021712 | 0.930800 |
| Ibuprofen | rs826033 | 11 | 73778943 | G | A | 0.4474 | 0.004081 | 0.000746 | 4.60E-08 | 0.000824 | 3.77 | -0.007648 | 0.009959 | 0.442524 |
| Ibuprofen | rs9349379 | 6 | 12903957 | G | A | 0.4056 | -0.004263 | 0.000756 | 1.70E-08 | 0.000876 | 4.01 | 0.001249 | 0.009777 | 0.898368 |

*Note: Note: EAF = Effect Allele Frequency; SE = Standard Error; R² (%) represents the percentage of phenotypic variance explained by the instrument; F-statistic indicates instrument strength; COPD= Chronic Obstructive Pulmonary Disease.*

**Supplementary Table S2. Detailed characteristics of genetic instruments used for the MR analysis of Chronic Obstructive Pulmonary Disease on Common Analgesics**

| **Outcome Phenotype** | **SNP** | **Chr** | **Pos** | **Effect Allele** | **Other Allele** | **EAF (Exposure)** | **Beta (Exposure)** | **SE (Exposure)** | **P-value (Exposure)** | **R² (%)** | **F-statistic** | **Beta (Outcome)** | **SE (Outcome)** | **P-value (Outcome)** |
| --- | --- | --- | --- | --- | --- | --- | --- | --- | --- | --- | --- | --- | --- | --- |
| Aspirin | rs11811826 | 1 | 204603861 | A | T | 0.2334 | -0.070796 | 0.011659 | 1.26E-09 | 0.1794 | 778.39 | 0.000415 | 0.000866 | 0.6300 |
| Aspirin | rs2855655 | 2 | 38304488 | C | T | 0.6575 | 0.060418 | 0.010316 | 4.73E-09 | 0.1644 | 713.43 | -0.000202 | 0.000733 | 0.7800 |
| Aspirin | rs624833 | 4 | 2881256 | G | T | 0.3569 | -0.056807 | 0.010267 | 3.15E-08 | 0.1481 | 642.70 | -0.000941 | 0.000783 | 0.2300 |
| Aspirin | rs1379933 | 4 | 89801156 | C | T | 0.3409 | -0.063683 | 0.010336 | 7.23E-10 | 0.1822 | 790.91 | -0.002053 | 0.000885 | 0.0200 |
| Aspirin | rs7676321 | 4 | 106437378 | A | G | 0.7165 | 0.066005 | 0.010892 | 1.36E-09 | 0.1770 | 768.09 | -0.000417 | 0.000831 | 0.6200 |
| Aspirin | rs6817273 | 4 | 145492003 | C | T | 0.5182 | -0.059730 | 0.009755 | 9.20E-10 | 0.1781 | 773.12 | 0.000167 | 0.000736 | 0.8200 |
| Aspirin | rs11749630 | 5 | 108499850 | G | T | 0.3598 | -0.059170 | 0.010160 | 5.76E-09 | 0.1613 | 699.83 | 0.000655 | 0.000774 | 0.4000 |
| Aspirin | rs6869423 | 5 | 120136555 | T | C | 0.4466 | 0.060133 | 0.009791 | 8.17E-10 | 0.1787 | 775.67 | -0.000401 | 0.000732 | 0.5800 |
| Aspirin | rs708461 | 5 | 132086817 | C | G | 0.2053 | 0.074785 | 0.011914 | 3.45E-10 | 0.1825 | 792.07 | 0.001183 | 0.001258 | 0.3500 |
| Aspirin | rs13361953 | 5 | 156926442 | C | T | 0.3724 | 0.056345 | 0.010034 | 1.96E-08 | 0.1484 | 643.79 | -0.000513 | 0.000763 | 0.5000 |
| Aspirin | rs7783505 | 7 | 85575393 | G | C | 0.3723 | -0.057896 | 0.010167 | 1.24E-08 | 0.1567 | 679.72 | 0.000982 | 0.000854 | 0.2500 |
| Aspirin | rs56223946 | 8 | 27413986 | T | C | 0.1003 | -0.111870 | 0.016708 | 2.15E-11 | 0.2259 | 980.76 | -0.002927 | 0.001101 | 0.0079 |
| Aspirin | rs13270042 | 8 | 112184023 | G | A | 0.1084 | 0.095265 | 0.015387 | 5.97E-10 | 0.1754 | 761.01 | 0.002089 | 0.001263 | 0.0980 |
| Aspirin | rs141715902 | 12 | 110752966 | T | C | 0.0242 | 0.181734 | 0.030837 | 3.78E-09 | 0.1557 | 675.67 | -0.002969 | 0.002140 | 0.1700 |
| Aspirin | rs28929474 | 14 | 94844947 | T | C | 0.0199 | 0.329086 | 0.032263 | 1.98E-24 | 0.4233 | 1841.56 | -0.002031 | 0.002592 | 0.4300 |
| Aspirin | rs16971904 | 15 | 41896795 | T | A | 0.0303 | -0.178432 | 0.029571 | 1.60E-09 | 0.1873 | 813.11 | -0.000512 | 0.003007 | 0.8600 |
| Aspirin | rs12914385 | 15 | 78898723 | T | C | 0.3568 | 0.192100 | 0.009993 | 2.38E-82 | 1.6938 | 7464.11 | -0.001797 | 0.000743 | 0.0160 |
| Aspirin | rs3936197 | 17 | 38194799 | A | G | 0.5415 | -0.054548 | 0.009781 | 2.45E-08 | 0.1477 | 641.01 | -0.000977 | 0.000732 | 0.1800 |
| Aspirin | rs4809542 | 20 | 61986787 | G | C | 0.1138 | 0.099840 | 0.015070 | 3.47E-11 | 0.2011 | 872.84 | 0.002327 | 0.001419 | 0.1000 |
| Ibuprofen | rs11811826 | 1 | 204603861 | A | T | 0.2334 | -0.070796 | 0.011659 | 1.26E-09 | 0.1794 | 778.39 | 0.001280 | 0.000892 | 0.1500 |
| Ibuprofen | rs2855655 | 2 | 38304488 | C | T | 0.6575 | 0.060418 | 0.010316 | 4.73E-09 | 0.1644 | 713.43 | -0.000918 | 0.000754 | 0.2200 |
| Ibuprofen | rs624833 | 4 | 2881256 | G | T | 0.3569 | -0.056807 | 0.010267 | 3.15E-08 | 0.1481 | 642.70 | -0.001222 | 0.000806 | 0.1300 |
| Ibuprofen | rs1379933 | 4 | 89801156 | C | T | 0.3409 | -0.063683 | 0.010336 | 7.23E-10 | 0.1822 | 790.91 | -0.000293 | 0.000911 | 0.7500 |
| Ibuprofen | rs7676321 | 4 | 106437378 | A | G | 0.7165 | 0.066005 | 0.010892 | 1.36E-09 | 0.1770 | 768.09 | 0.001471 | 0.000855 | 0.0860 |
| Ibuprofen | rs6817273 | 4 | 145492003 | C | T | 0.5182 | -0.059730 | 0.009755 | 9.20E-10 | 0.1781 | 773.12 | 0.000364 | 0.000758 | 0.6300 |
| Ibuprofen | rs11749630 | 5 | 108499850 | G | T | 0.3598 | -0.059170 | 0.010160 | 5.76E-09 | 0.1613 | 699.83 | 0.000733 | 0.000797 | 0.3600 |
| Ibuprofen | rs708461 | 5 | 132086817 | C | G | 0.2053 | 0.074785 | 0.011914 | 3.45E-10 | 0.1825 | 792.07 | 0.003233 | 0.001296 | 0.0130 |
| Ibuprofen | rs13361953 | 5 | 156926442 | C | T | 0.3724 | 0.056345 | 0.010034 | 1.96E-08 | 0.1484 | 643.79 | 0.000040 | 0.000786 | 0.9600 |
| Ibuprofen | rs7783505 | 7 | 85575393 | G | C | 0.3723 | -0.057896 | 0.010167 | 1.24E-08 | 0.1567 | 679.72 | 0.000724 | 0.000879 | 0.4100 |
| Ibuprofen | rs56223946 | 8 | 27413986 | T | C | 0.1003 | -0.111870 | 0.016708 | 2.15E-11 | 0.2259 | 980.76 | 0.000137 | 0.001134 | 0.9000 |
| Ibuprofen | rs13270042 | 8 | 112184023 | G | A | 0.1084 | 0.095265 | 0.015387 | 5.97E-10 | 0.1754 | 761.01 | -0.002139 | 0.001300 | 0.1000 |
| Ibuprofen | rs141715902 | 12 | 110752966 | T | C | 0.0242 | 0.181734 | 0.030837 | 3.78E-09 | 0.1557 | 675.67 | 0.002661 | 0.002203 | 0.2300 |
| Ibuprofen | rs28929474 | 14 | 94844947 | T | C | 0.0199 | 0.329086 | 0.032263 | 1.98E-24 | 0.4233 | 1841.56 | 0.002823 | 0.002669 | 0.2900 |
| Ibuprofen | rs16971904 | 15 | 41896795 | T | A | 0.0303 | -0.178432 | 0.029571 | 1.60E-09 | 0.1873 | 813.11 | 0.000416 | 0.003096 | 0.8900 |
| Ibuprofen | rs12914385 | 15 | 78898723 | T | C | 0.3568 | 0.192100 | 0.009993 | 2.38E-82 | 1.6938 | 7464.11 | -0.001216 | 0.000765 | 0.1100 |
| Ibuprofen | rs3936197 | 17 | 38194799 | A | G | 0.5415 | -0.054548 | 0.009781 | 2.45E-08 | 0.1477 | 641.01 | -0.000511 | 0.000753 | 0.5000 |
| Ibuprofen | rs4809542 | 20 | 61986787 | G | C | 0.1138 | 0.099840 | 0.015070 | 3.47E-11 | 0.2011 | 872.84 | -0.001964 | 0.001461 | 0.1800 |
| Paracetamol | rs11811826 | 1 | 204603861 | A | T | 0.2334 | -0.070796 | 0.011659 | 1.26E-09 | 0.1794 | 778.39 | 0.000590 | 0.001032 | 0.5700 |
| Paracetamol | rs2855655 | 2 | 38304488 | C | T | 0.6575 | 0.060418 | 0.010316 | 4.73E-09 | 0.1644 | 713.43 | -0.000403 | 0.000873 | 0.6400 |
| Paracetamol | rs624833 | 4 | 2881256 | G | T | 0.3569 | -0.056807 | 0.010267 | 3.15E-08 | 0.1481 | 642.70 | -0.001879 | 0.000933 | 0.0440 |
| Paracetamol | rs1379933 | 4 | 89801156 | C | T | 0.3409 | -0.063683 | 0.010336 | 7.23E-10 | 0.1822 | 790.91 | 0.000351 | 0.001054 | 0.7400 |
| Paracetamol | rs7676321 | 4 | 106437378 | A | G | 0.7165 | 0.066005 | 0.010892 | 1.36E-09 | 0.1770 | 768.09 | 0.000533 | 0.000990 | 0.5900 |
| Paracetamol | rs6817273 | 4 | 145492003 | C | T | 0.5182 | -0.059730 | 0.009755 | 9.20E-10 | 0.1781 | 773.12 | -0.000833 | 0.000877 | 0.3400 |
| Paracetamol | rs11749630 | 5 | 108499850 | G | T | 0.3598 | -0.059170 | 0.010160 | 5.76E-09 | 0.1613 | 699.83 | 0.001295 | 0.000922 | 0.1600 |
| Paracetamol | rs6869423 | 5 | 120136555 | T | C | 0.4466 | 0.060133 | 0.009791 | 8.17E-10 | 0.1787 | 775.67 | 0.001742 | 0.000872 | 0.0460 |
| Paracetamol | rs708461 | 5 | 132086817 | C | G | 0.2053 | 0.074785 | 0.011914 | 3.45E-10 | 0.1825 | 792.07 | 0.002118 | 0.001500 | 0.1600 |
| Paracetamol | rs13361953 | 5 | 156926442 | C | T | 0.3724 | 0.056345 | 0.010034 | 1.96E-08 | 0.1484 | 643.79 | 0.000524 | 0.000909 | 0.5600 |
| Paracetamol | rs7783505 | 7 | 85575393 | G | C | 0.3723 | -0.057896 | 0.010167 | 1.24E-08 | 0.1567 | 679.72 | -0.000877 | 0.001018 | 0.3900 |
| Paracetamol | rs56223946 | 8 | 27413986 | T | C | 0.1003 | -0.111870 | 0.016708 | 2.15E-11 | 0.2259 | 980.76 | -0.000475 | 0.001313 | 0.7200 |
| Paracetamol | rs13270042 | 8 | 112184023 | G | A | 0.1084 | 0.095265 | 0.015387 | 5.97E-10 | 0.1754 | 761.01 | -0.002988 | 0.001505 | 0.0470 |
| Paracetamol | rs141715902 | 12 | 110752966 | T | C | 0.0242 | 0.181734 | 0.030837 | 3.78E-09 | 0.1557 | 675.67 | -0.001573 | 0.002550 | 0.5400 |
| Paracetamol | rs28929474 | 14 | 94844947 | T | C | 0.0199 | 0.329086 | 0.032263 | 1.98E-24 | 0.4233 | 1841.56 | 0.004275 | 0.003089 | 0.1700 |
| Paracetamol | rs16971904 | 15 | 41896795 | T | A | 0.0303 | -0.178432 | 0.029571 | 1.60E-09 | 0.1873 | 813.11 | -0.001433 | 0.003584 | 0.6900 |
| Paracetamol | rs12914385 | 15 | 78898723 | T | C | 0.3568 | 0.192100 | 0.009993 | 2.38E-82 | 1.6938 | 7464.11 | 0.000547 | 0.000885 | 0.5400 |
| Paracetamol | rs3936197 | 17 | 38194799 | A | G | 0.5415 | -0.054548 | 0.009781 | 2.45E-08 | 0.1477 | 641.01 | -0.002232 | 0.000872 | 0.0110 |
| Paracetamol | rs4809542 | 20 | 61986787 | G | C | 0.1138 | 0.099840 | 0.015070 | 3.47E-11 | 0.2011 | 872.84 | 0.001335 | 0.001692 | 0.4300 |

*Note: Note: EAF = Effect Allele Frequency; SE = Standard Error; R² (%) represents the percentage of phenotypic variance explained by the instrument; F-statistic indicates instrument strength; COPD= Chronic Obstructive Pulmonary Disease.*
